# Supplementary material for: Mechanism of activation and regulation of deubiquitinase activity in MINDY1 and MINDY2
Source: PubMed Central journal article supplement (PMC8550791; doi:10.1016/j.molcel.2021.08.024), 2021-10-21
Supplement: mmc1.pdf [file mmc1.pdf]

**Molecular Cell, Volume 81**

**Supplemental information**

**Mechanism of activation and regulation  
of deubiquitinase activity in MINDY1 and MINDY2**

**Syed Arif Abdul Rehman, Lee A. Armstrong, Sven M. Lange, Yosua Adi  
Kristariyanto, Tobias W. Gräwert, Axel Knebel, Dmitri I. Svergun, and Yogesh Kulathu**

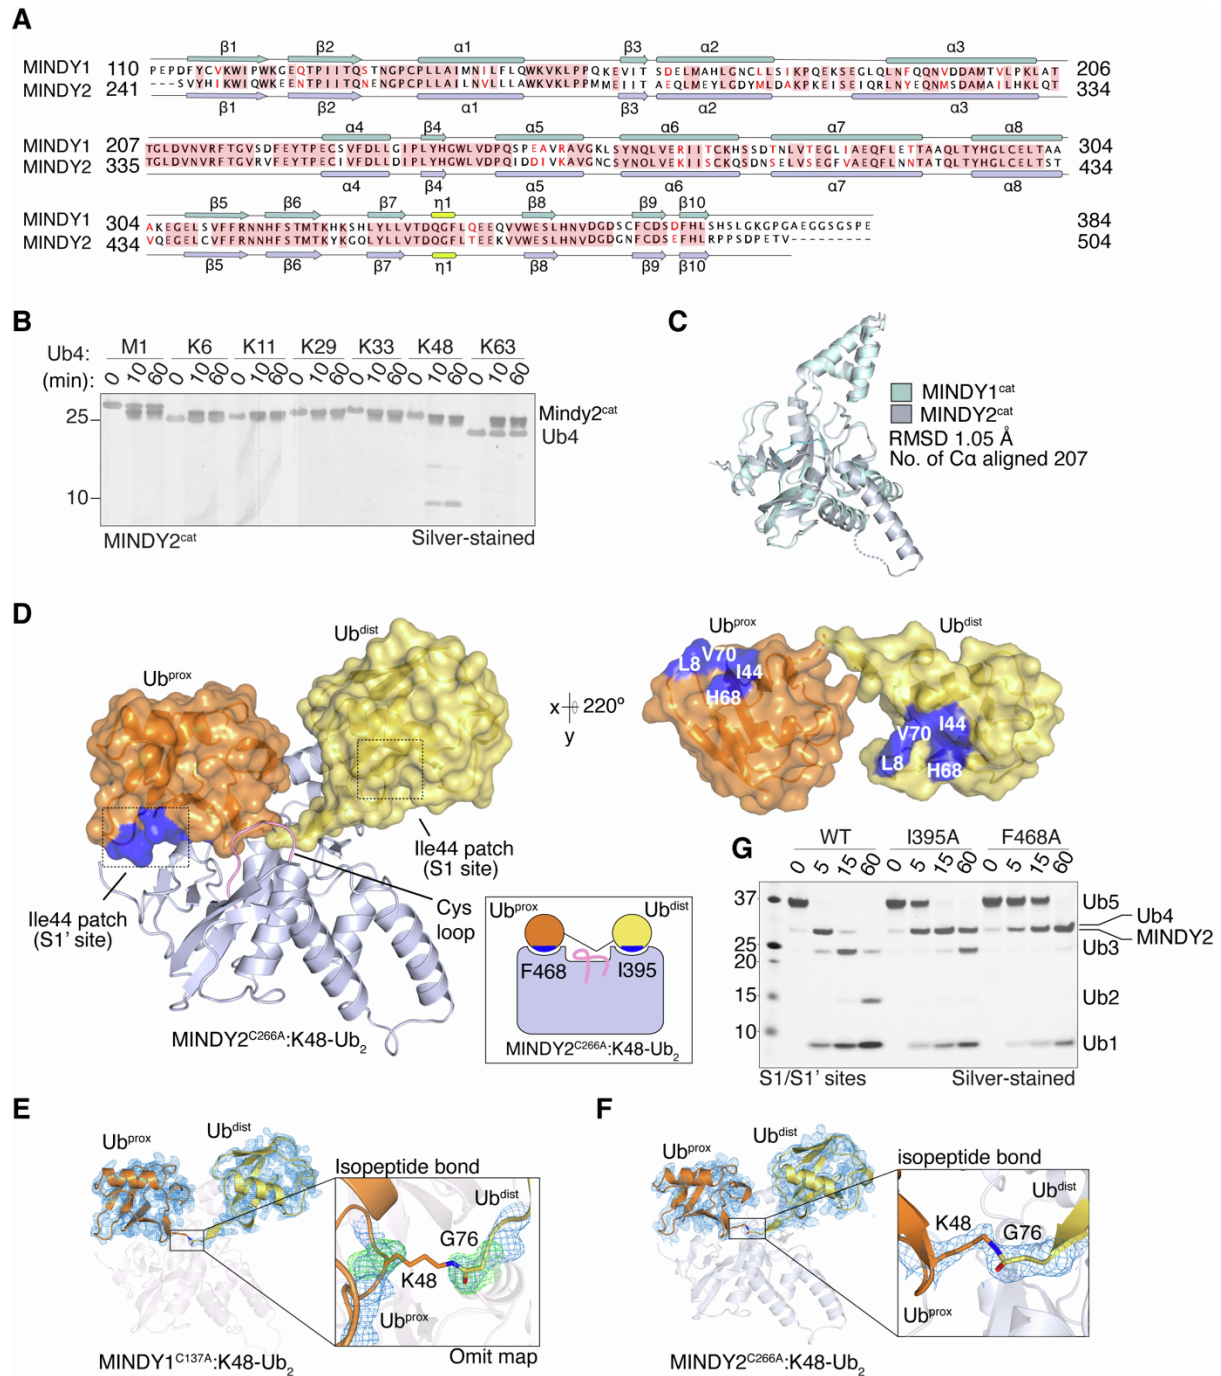

**Figure S1 Crystal structure of MINDY1/2 in complex with K48-linked diUb**

**A)** Secondary structure alignment of MINDY1 and MINDY2 based on their crystal structures using ESPRIPT webserver (<http://espript.ibcp.fr/ESPrIPT/ESPrIPT/>). The secondary structure elements of MINDY1 and MINDY2 are shown in pale cyan and light orange respectively.

**B)** Silver stained gels of DUB assays testing activity and specificity of polyUb cleavage by MINDY2 catalytic domain (241–504). 1.6  $\mu$ M of DUB was incubated with 2.2  $\mu$ M of tetraUb chains for the indicated time points.

**C)** Superposition of the crystal structures of the minimal catalytic domains of MINDY1 (pale-cyan) and MINDY2 (light-orange) shown in cartoon representation.

**D)** The MINDY2<sup>C266A</sup>:K48-diUb complex crystal structure is shown with MINDY2 in cartoon (blue white). Ub molecules are depicted with transparent surfaces (tv-orange:Ub<sup>prox</sup> and yelloworange:Ub<sup>dist</sup>). 144 patches on Ub are coloured blue and an alternate view of the bound diUb rotated by 220° along the x-axis is shown on the right side. Schematic representation of MINDY2<sup>C266A</sup>:K48-diUb complex (inset).

**E)** The crystal structure of MINDY1<sup>C137A</sup>:K48-diUb complex with electron density for both proximal and distal Ub (orange and light-brown) contoured at 1.0  $\sigma$ . In the inset, the  $F_o - F_c$  omit electron density map was generated from coefficients calculated by removing G76 and K48 from the distal and proximal Ub moieties, respectively, from the atomic model for 10 cycles of refinement. The  $F_o - F_c$  map is contoured at 3.0  $\sigma$  whereas  $2F_o - F_c$  map is contoured at 1.0  $\sigma$ .

**F)** As in (E) for the MINDY2<sup>C266A</sup>:K48-diUb complex.

**G)** DUB assay monitoring cleavage of K48-Ub<sub>5</sub> by MINDY2<sup>cat</sup> and the indicated S1 and S1' mutants.

Related to Figure 1

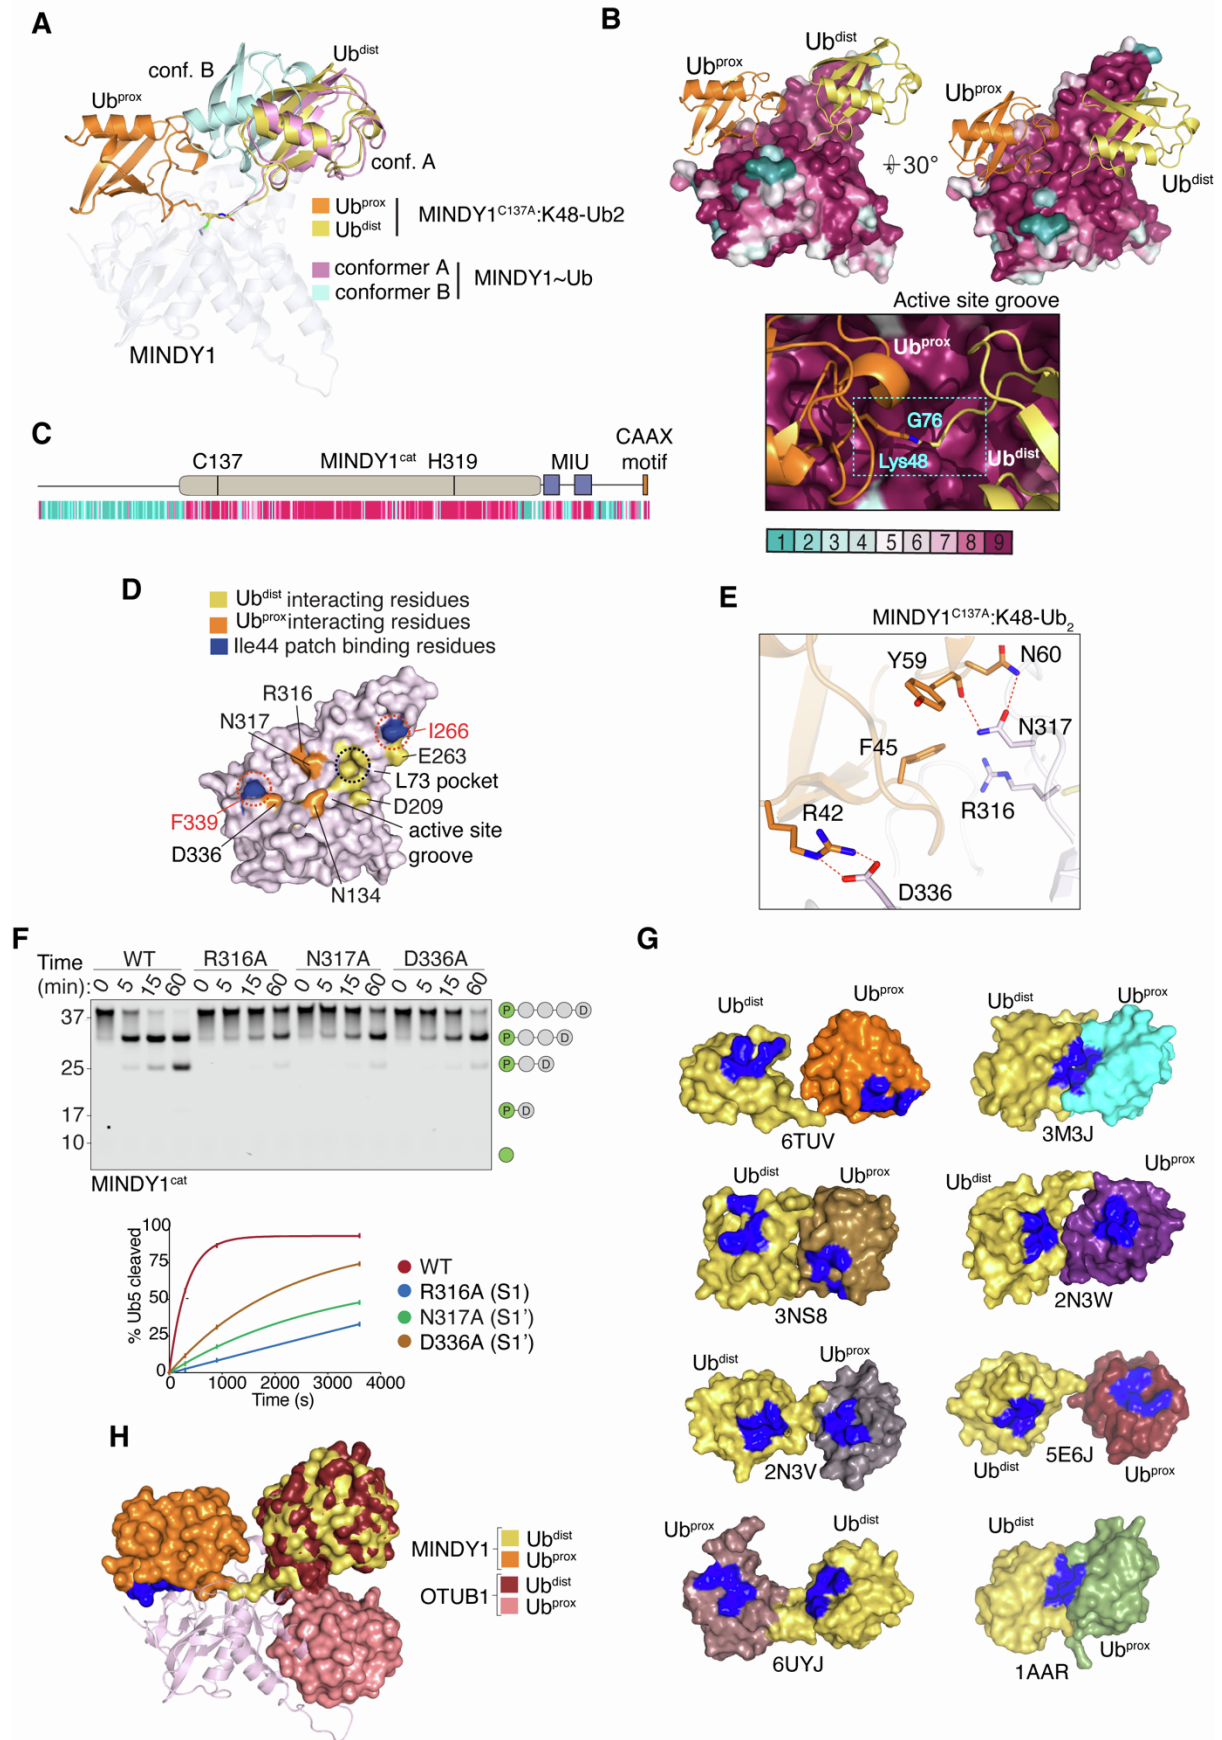

Figure S2 Analysis of K48-Ub2 interaction with MINDY1



**A)** Superposition of the MINDY1<sup>C137A</sup>:K48-Ub<sub>2</sub> complex with MINDY1~Ub<sup>Prg</sup> complex reveals that proximal Ub stabilises the binding of Ub onto the S1 site.

**B-C)** The evolutionary conservation score of MINDY1 was calculated using the crystal structure of MINDY1 and primary sequences from 19 species using the ConSurf webserver. The conservation score was projected both on to the primary sequence (A) and the surface representation of the crystal structure of MINDY1 (panel B) The distal and proximal Ub binding region has been highlighted. In the inset, a close-up view reveals conservation of the active site and the catalytic groove (cyan dashed box) accommodating the scissile bond across the active site.

**D)** Surface representation of MINDY1 highlighting key interaction interfaces.

**E)** Close-up view of the critical polar interaction between MINDY1 (pink) and the proximal Ub (orange).

**F)** DUB assay comparing activity of different S1' site mutants at cleaving fluorescently-labelled pentaUb. The percent hydrolysis of K48 linked polyUb chains for the different mutants is plotted against time for the DUB assay (bottom).

**G)** Comparison of different K48-linked diUb structures shown in surface representation with the I44 patches highlighted in blue. MINDY1<sup>C137A</sup>:K48-diUb (PDB ID: 6TUV); Solution structure of the Rpn1 T1 site with K48-linked diUb in the contracted binding mode (PDB ID: 2N3W) and in the extended binding mode (PDB ID: 2N3V) (Chen et al., 2016); A new crystal form of K48-linked diUb (PDB ID: 3M3J) (Trempe et al., 2010); Crystal structure of an open conformation of K48-linked diUb at pH 7.5 (PDB ID: 3NS8) ; Crystal structure of diUb bound to SARS PLpro (PDBID: 5E6J) (Békés et al., 2016b); hRpn13:hRpn2:K48-diUb structure (PDB ID: 6UYJ) (Lu et al., 2020) and crystal structure of a diUb and model for interaction with E2 (PDBID:1AAR) (Cook et al., 1992b).

**H)** Comparison of the conformation adopted by the Ub molecules present in the OTUB1~Ub:Ubc13~Ub complex (PDB ID: 4LDT) superposed on the distal Ub of MINDY1<sup>C137A</sup>:K48-diUb (PDB ID: 6TUV)

Related to Figure 1

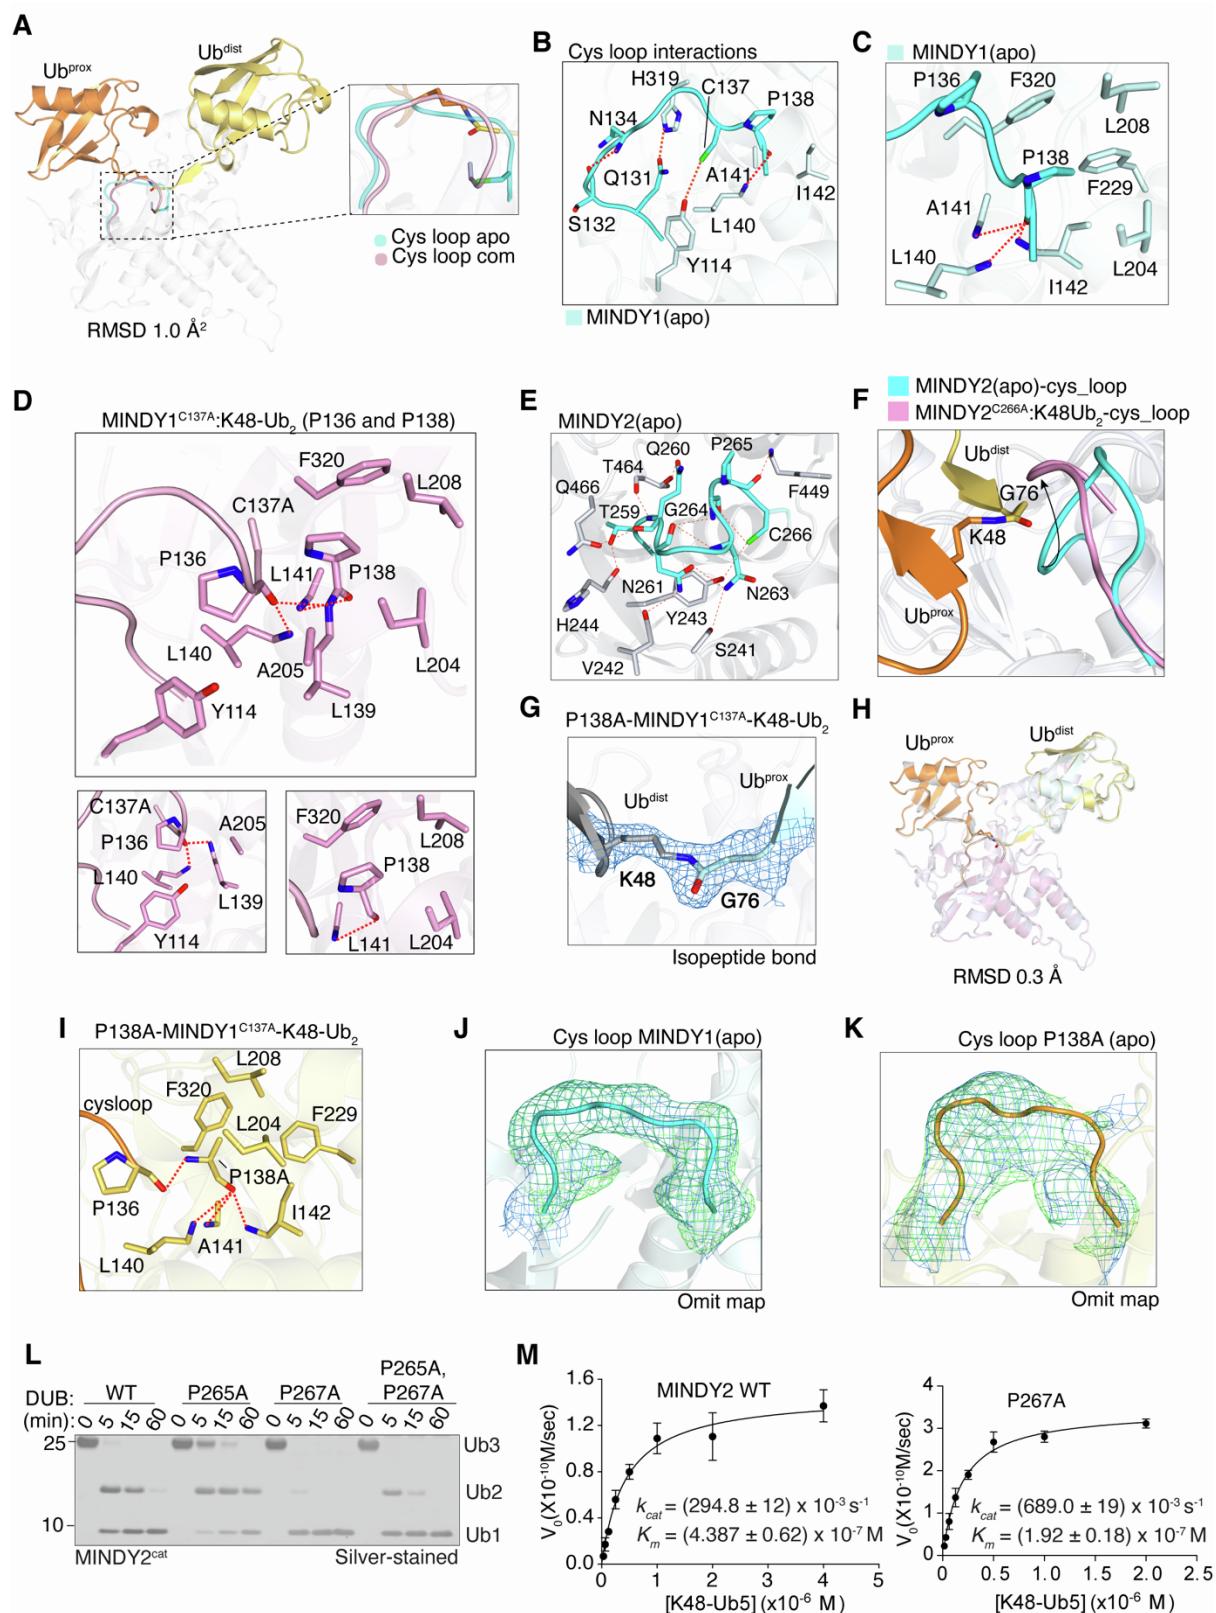

**Figure S3 Cys loop regulates activity of MINDY1 and MINDY2**

**A)** Cartoon representation of the crystal structures of MINDY1(apo) and the MINDY1<sup>C137A</sup>:K48-Ub<sub>2</sub> complexes (RMSD 1.0 Å). Close up view of the Cys loop in the apo state (cyan) and active state (pink).

**B)** The hydrogen bond network of the Cys loop of MINDY1(apo). Dashed lines indicate hydrogen bonds.

**C)** Hydrogen bonds formed by the backbone of P138 in MINDY1 (apo).

**D)** Close up views of hydrophobic interactions (left) and hydrogen bonding with P136 and P138 (right) in the MINDY1<sup>C137A</sup>:K48-Ub<sub>2</sub> complex.

**E)** Interaction network of the Cys loop in MINDY2 apo.

**F)** Superposition of the Cys loop in MINDY2<sup>apo</sup> (cyan) and MINDY2<sup>C266A</sup>:K48-Ub<sub>2</sub> complex (pink). The incoming isopeptide can be seen clashing with the Cys loop in MINDY2 apo.

**G)** Close-up view showing electron density  $2Fo-Fc$  map contoured at 1.0  $\sigma$  of the isopeptide bond of the K48-Ub<sub>2</sub> from the P138A:K48-Ub<sub>2</sub> complex.

**H)** Superposition of MINDY1<sup>C137A</sup>:K48-Ub<sub>2</sub> and MINDY1<sup>C137A P138A</sup>:K48-Ub<sub>2</sub> complexes.

**I)** Close-up view of the MINDY1<sup>C137A P138A</sup>:K48-Ub<sub>2</sub> complex showing the hydrogen bonding network of the mutant Cys loop.

**J-K)** Omit maps for MINDY1<sup>apo</sup> and MINDY1 P138A Cys loops. The  $|Fo|-|Fc|$  electron density map was generated from coefficients calculated by deleting the Cys loop residues from the respective atomic models for 10 cycles of refinement. The  $Fo-Fc$  map is contoured at 3.0  $\sigma$  and the  $2Fo-Fc$  map is contoured at 1.0  $\sigma$ .

**L)** DUB assay monitoring K48-Ub<sub>3</sub> chain hydrolysis by MINDY2 WT and the mutants P265A, P267A and the double mutant P265A P267A. These two prolines flank the catalytic cysteine (C266).

**M)** Steady-state enzyme kinetics of K48-linked pentaUb cleavage by MINDY2 WT and the P267A mutant. The DUB was incubated with varying concentrations of fluorescently labelled pentaUb. (n= 2; mean  $\pm$  SD).

Related to Figure 2

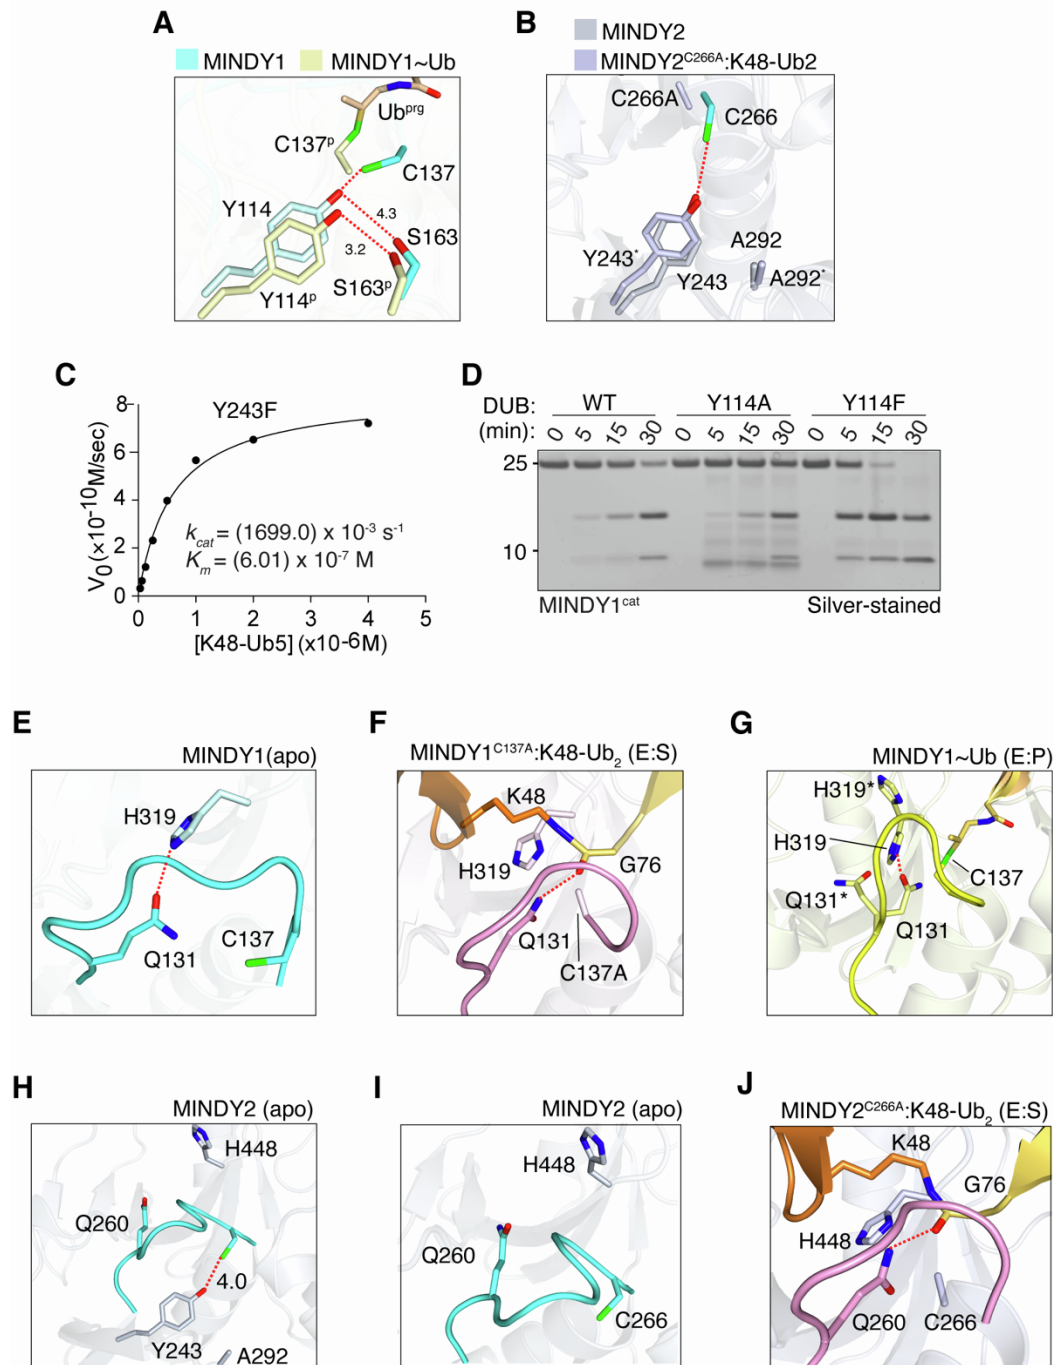

**Figure S4 Autoinhibition and activation of MINDY1 and MINDY2**

**A)** Close up view of Y114 in a superposition between MINDY1 (apo) and MINDY1~Ub<sup>Prg</sup>. Dotted lines indicate hydrogen bond.

**B)** Close up view of superposition of MINDY2 apo and MINDY2<sup>C266A</sup>:K48-Ub<sub>2</sub> complex showing Y243. A292, the equivalent residue of S163 in MINDY1 does not induce lateral movement of the tyrosine observed in MINDY1. Asterisk indicates residues in complex.

**C)** Steady-state enzyme kinetics of K48-linked pentaUb cleavage by MINDY2 Y243F mutant. (n=1)

- D)** DUB assay monitoring the cleavage of K48linked-triUb chain by MINDY1 WT and Y114A and Y114F mutants. Of note, expression and stability of MINDY1 is affected by the Y114A mutation suggesting an additional structural role for Y114 in stabilizing local structure especially around the Cys loop.
- E)** A close-up view of MINDY1 apo catalytic site. The catalytic cysteine (C137) is rotated away from hydrogen bonding distance with the catalytic histidine (H319). Dotted lines indicate hydrogen bond.
- F)** A close-up view of the catalytic site in the MINDY1<sup>C137A</sup>:K48-Ub<sub>2</sub> complex. The isopeptide bond can be seen interacting with the catalytic H319. Q131 is seen interacting with the isopeptide bond. Dotted lines indicate hydrogen bond.
- G)** A close-up view of the catalytic site in the MINDY1~UbPrg complex, where both H319 and Q131 exist in two alternate conformations. Dotted lines indicate hydrogen bond.
- H)** A close-up view of the catalytic site in MINDY2 showing key residues. The catalytic cysteine (C266) in MINDY2 is out of plane with the other catalytic residues and instead can be seen interacting with the non-catalytic Y243. Unlike MINDY1, the oxyanion forming glutamine (Q260) is not able to form any bonds with the flipped out catalytic histidine (H448). Dashed lines indicate hydrogen bond.
- I)** A close-up view of MINDY2 (apo) showing the catalytic cysteine (C266) rotated away from the hydrogen bonding distance with the catalytic histidine (H448).
- J)** View of the catalytic site in the MINDY2<sup>C266A</sup>:K48-Ub<sub>2</sub> complex showing catalytically productive rearrangements upon K48-diUb binding. The catalytic histidine (H448) is seen to have flipped in plane with the catalytic cysteine (C266\*). The oxyanion forming glutamine (Q260) is seen interacting with the isopeptide bond of the bound K48 chain.

Related to Figure 3



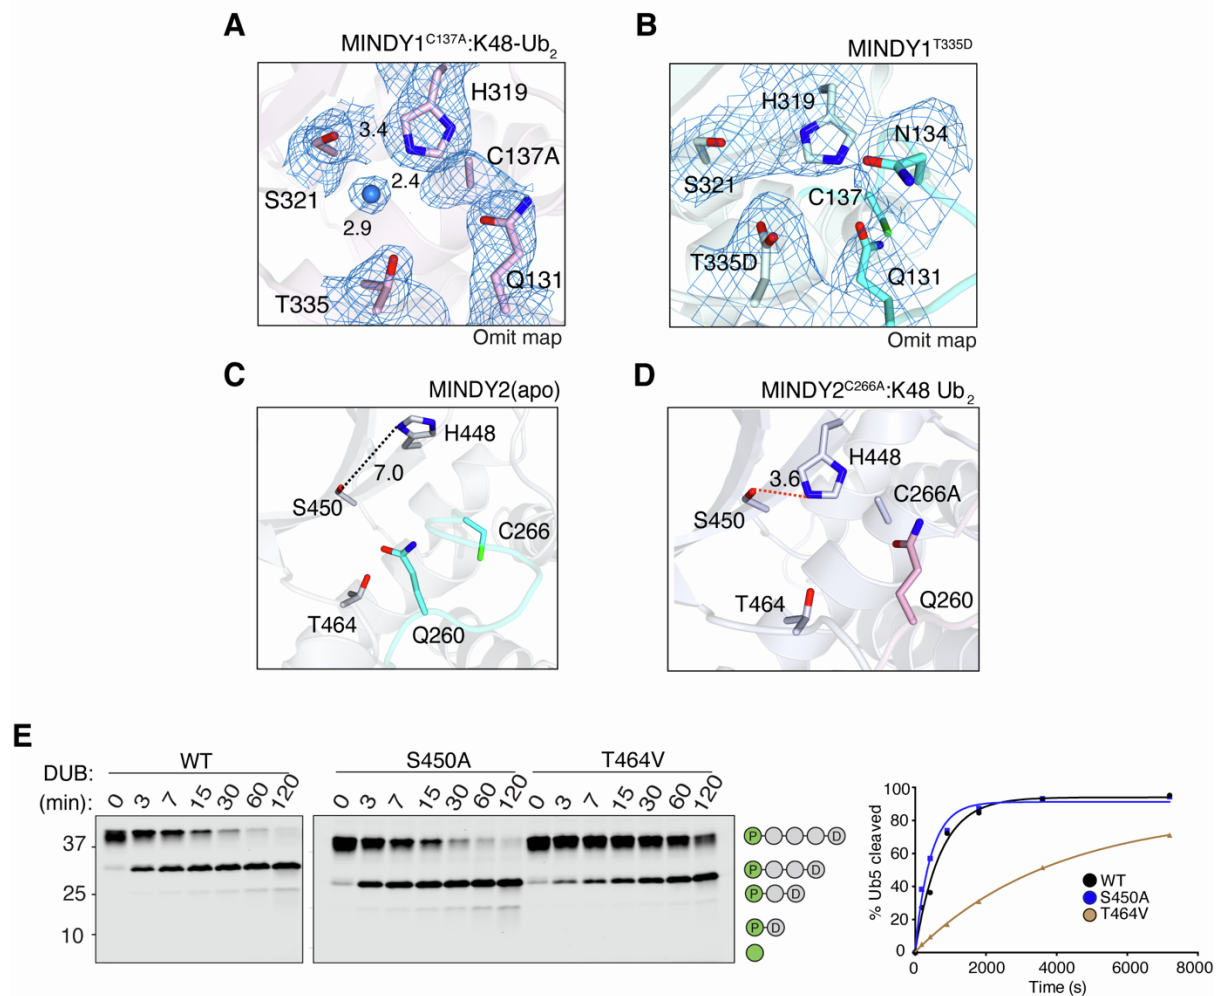

**Figure S5 Catalytic mechanism of MINDY2**

**A)** Close up view of the catalytic site in the crystal structure of MINDY1<sup>C137A</sup>:K48-Ub<sub>2</sub> showing the coordination of a water molecule by T335 and H319. The respective residues are shown with *2Fo-Fc* electron density contoured at 1.0  $\sigma$ .

**B)** Close up view of the catalytic site in the crystal structure of MINDY1 T335D showing the formation of an ionic bond between T335D and the catalytic histidine (H319). The respective residues are shown with *2Fo-Fc* electron density contoured at 1.0  $\sigma$ .

**C)- D)** Close up view of the catalytic site architecture in inhibited state MINDY2 apo (B) and in the active state in MINDY2<sup>C266A</sup>:K48-Ub<sub>2</sub> (C).

**E)** DUB assay monitoring cleavage of fluorescently labelled K48-linked pentaUb chains by MINDY2 and the indicated mutants. Quantification of pentaUb cleavage is shown on the right. Gel is truncated to exclude mutants irrelevant to the study.

Related to Figure 4



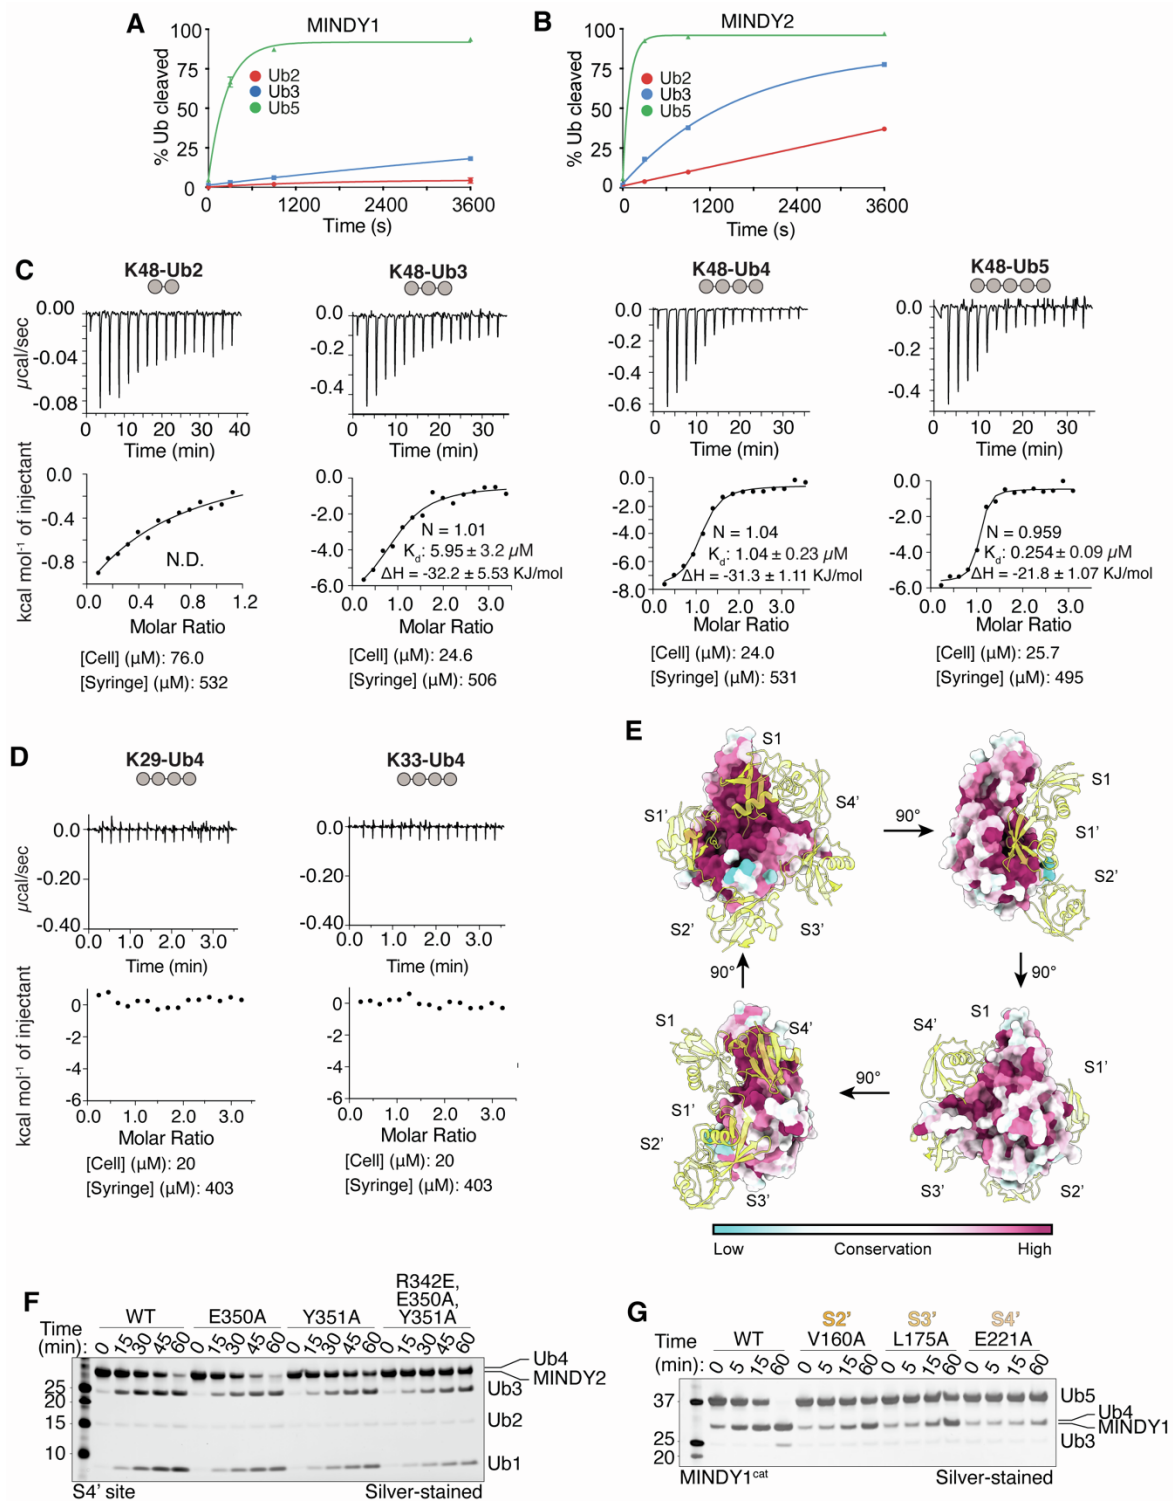

**Figure S6 Recognition of K48 chains by MINDY1/2**

**A-B)** MINDY1 and MINDY2 prefer to cleave longer chains. The percentage of fluorescently labelled K48-linked Ub<sub>2</sub>, Ub<sub>3</sub>, and Ub<sub>5</sub> cleaved over time by MINDY1 and MINDY2 is plotted. n=2; mean±SD

- C)** Isothermal titration calorimetry (ITC) data measuring binding of MINDY1<sup>C137A</sup> with K48-linked polyUb chains of the indicated lengths. Indicated concentrations of MINDY in the syringe was injected into polyUb chains in the cell. n=2; mean±SD
- D)** ITC data measuring binding of MINDY1<sup>C137A</sup> to K29- and K33-linked tetraUb. Indicated concentrations of MINDY in the syringe was injected into tetraUb chains in the cell.
- E)** ConSurf analysis of the Ub binding sites on MINDY1
- F)** DUB assay of a series of mutations at the S4' site of MINDY2 against K48-Ub4
- G)** DUB assay comparing cleavage of K48-Ub5 by WT MINDY1<sup>cat</sup> and S2', S3' and S4' site mutants.

Related to Figure 5

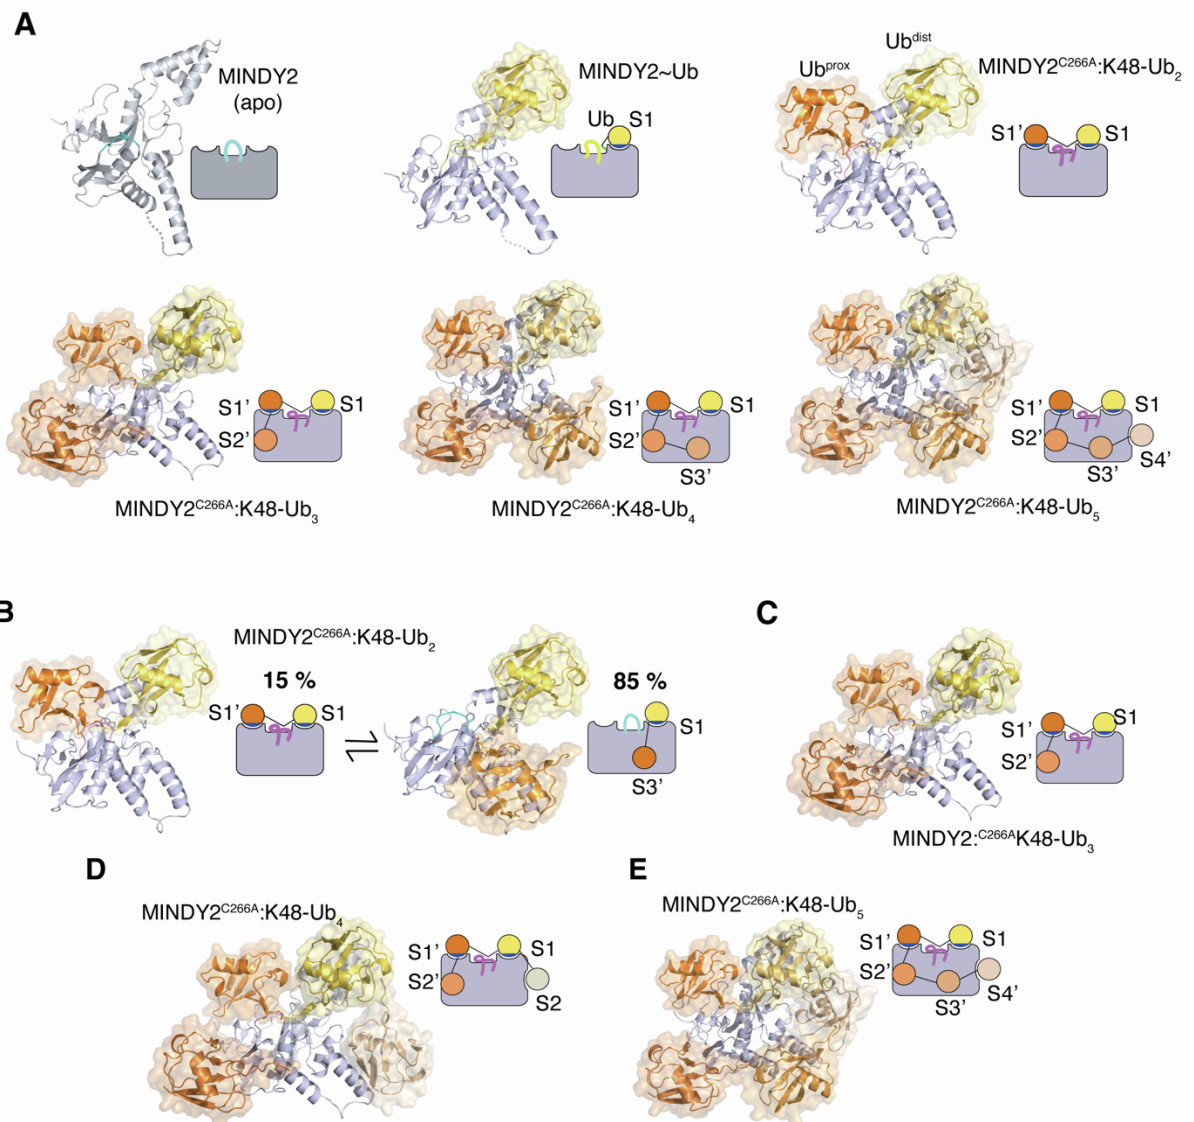

**Figure S7. Small angle X-ray scattering analysis of MINDY2 complexes**

**A)** The models used in the curve fitting with the SAXS data are depicted along with a schematic representation.

**B)** MINDY2<sup>C266A</sup>;K48-Ub<sub>2</sub> model validated with considerable agreement.

**C)** MINDY2<sup>C266A</sup>;K48-Ub<sub>3</sub> models observed and validated in SAXS measurements with some deviations and improved curve fitting post normal mode analysis run. The model was obtained by refinement of Ub positions.

**D)** MINDY2<sup>C266A</sup>;K48-Ub<sub>4</sub> models were corrected after normal mode analysis and validated with considerable agreement.

**E)** MINDY2<sup>C266A</sup>;K48-Ub<sub>5</sub> models validated with considerable agreement.

Related to Figure 5

Figure S8

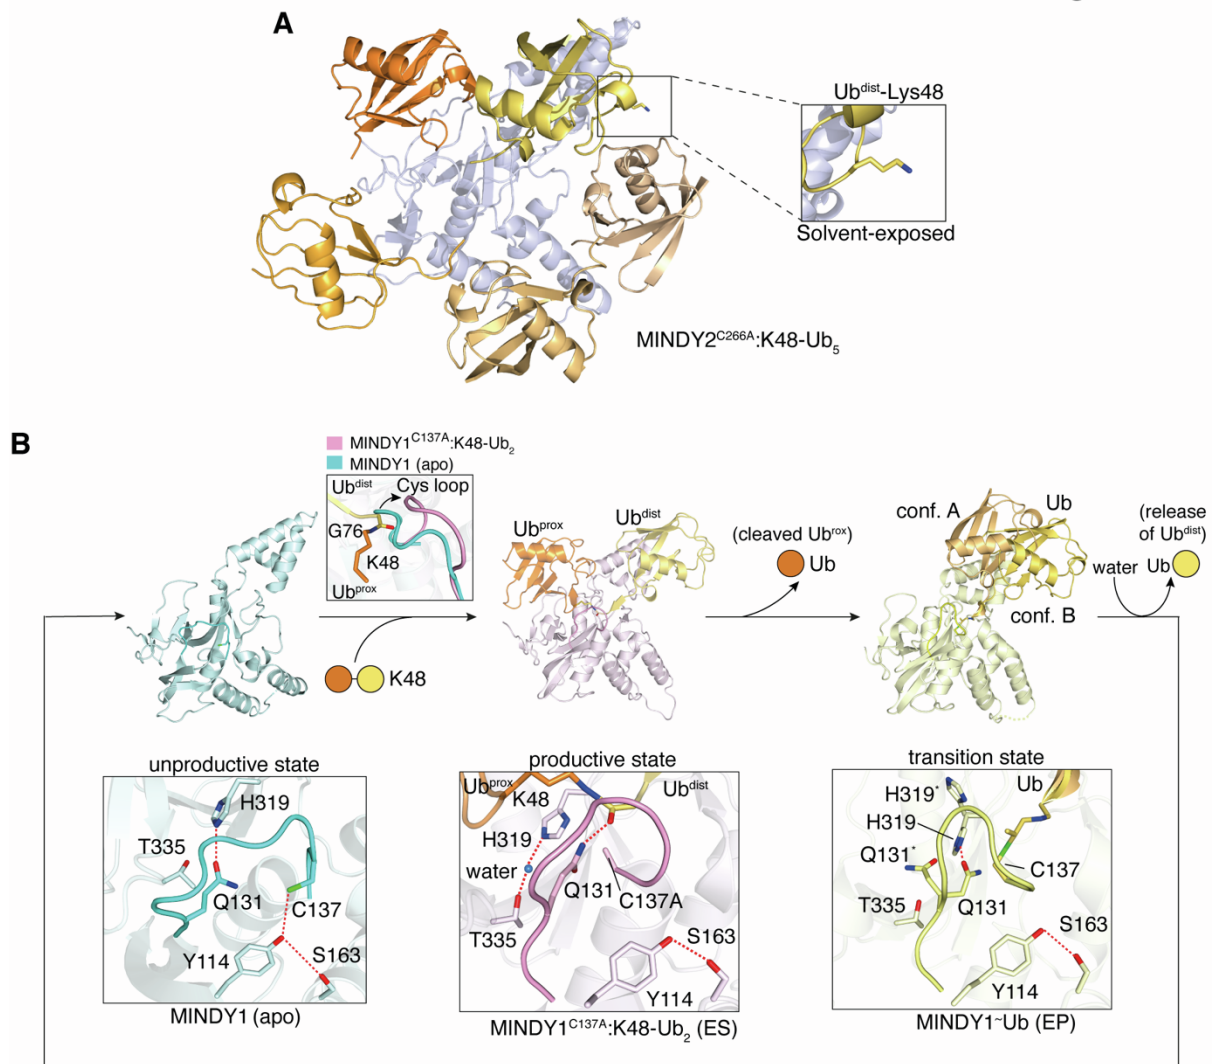

**Figure S8 Mechanism of substrate recognition and cleavage by MINDY1/2**

**A)** Crystal structure of MINDY2<sup>C266A</sup>:K48-Ub<sub>5</sub> complex highlighting the solvent-exposed Lys48 residue of Ub<sup>dist</sup>.

**B)** Related to **Fig 7**, this shows the structures and the transitions in the catalytic cycle of MINDY1 going from inactive state to substrate bound active state and MINDY1 in the transition state bound to product intermediate.

Related to Figure 7

**Table S1: Summary of major Ub interactions with DUBs, related to Figure 1**

| PDB ID     | Title of Structure                                                                                                                           | Ub <sup>prox</sup>                                                             | Ub <sup>dist</sup>                                                                |
|------------|----------------------------------------------------------------------------------------------------------------------------------------------|--------------------------------------------------------------------------------|-----------------------------------------------------------------------------------|
| 6TUV, 6Z7V | MINDY1 in complex with K48-linked diubiquitin                                                                                                | L 8, I44<br>V70, F45<br>R42                                                    | L 8, I44<br>V70, L73<br>R42                                                       |
| 6NJD       | <a href="#">Crystal structure of RavD from Legionella pneumophila complexed with Met-1 linked di-ubiquitin</a>                               | H61, K33<br>G35, Q2<br>E16, E64<br>D32                                         | L8, I44, V70, L73,<br>L73, R74<br>K6, R42, K48, R72                               |
| 5LRV       | <a href="#">Structure of Cezanne/OTUD7B OTU domain bound to K11-linked diubiquitin</a>                                                       | K33, D32<br>E34, G35<br>K33, D32                                               | I44, I36, L71, L73,<br>Ile13, I30<br>L69, L8, R42, R72,<br>R74                    |
| 2ZNV       | <a href="#">Crystal structure of human AMSH-LP DUB domain in complex with K63-linked ubiquitin dimer</a>                                     | F4, Gln62<br>E64, Asn60<br>K63                                                 | L73, V70, I44, L8,<br>I36, L71<br>R42, R72, R74, K48,<br>K6, His68<br>D39, R74    |
| 4NQL       | <a href="#">The crystal structure of the DUB domain of AMSH orthologue, Sst2 from S. pombe, in complex with lysine 63-linked diubiquitin</a> | F4, Gln62<br>E64, Q2<br>K63                                                    | L73, I44, V70, L8,<br>L71, I36<br>L69, R42<br>R72, His68                          |
| 5OHP       | <a href="#">Crystal structure of USP30 (C77A) in complex with K6-linked diubiquitin</a>                                                      | L8, F4<br>K6, His68<br>E64, K11                                                | L71, L73, I36, Pro37,<br>F4, G76<br>G75, R74, R42, R72,<br>K48, K6<br>E16, F4, K6 |
| 3WXE       | <a href="#">Crystal structure of CYLD USP domain (C596S) in complex with M1-linked diubiquitin</a>                                           | F4, M1<br>Q2, Thr12<br>E64, Glu18<br>K6, E16<br>F4, K63                        | V70, L8<br>I36, L69<br>L71, L73<br>G75, R74<br>R42, R72<br>Glu51, K6              |
| 3WXG       | <a href="#">Crystal structure of CYLD USP domain (C596A) in complex with K63-linked diubiquitin</a>                                          | F4, E64, K63, Glu18<br>K29, K6, E16                                            | V70, L8, I36, L69,<br>L71, L73<br>G75, G76, R74, R42,<br>R72, Glu51<br>K6         |
| 3ZNZ       | <a href="#">Crystal structure of OTULIN OTU domain (C129A) in complex with M1- di ubiquitin</a>                                              | K33, D32<br>M1, Q2<br>E34, K63<br>K33, E34<br>D32, E64<br>K63, K29<br>E16, K33 | L8, I44, V70<br>G75, G76<br>R42, Glu32<br>K11                                     |
| 5KSL       | <a href="#">Structure of OTULIN bound to the M1-linked diubiquitin activity probe</a>                                                        |                                                                                |                                                                                   |
| 5OE7       | <a href="#">Gumby/Fam105B in complex with linear di-ubiquitin</a>                                                                            |                                                                                |                                                                                   |

**Colour coding:** Hydrophobic; Hydrogen bond; Ionic bond; Cation-Pi

**Table S2: SAXS data collection, related to Figure 5**

| <b>Data collection parameters</b>               |                                            |                 |                 |                 |                 |                 |
|-------------------------------------------------|--------------------------------------------|-----------------|-----------------|-----------------|-----------------|-----------------|
| Radiation source                                | PETRA III<br>(DESY, Hamburg, Germany)      |                 |                 |                 |                 |                 |
| Beamline                                        | EMBL P12                                   |                 |                 |                 |                 |                 |
| Detector                                        | PILATUS 6M                                 |                 |                 |                 |                 |                 |
| Beam geometry (mm, FWHM)                        | 0.12 x 0.20                                |                 |                 |                 |                 |                 |
| Wavelength (nm)                                 | 0.12                                       |                 |                 |                 |                 |                 |
| Sample-detector distance (m)                    | 3.0                                        |                 |                 |                 |                 |                 |
| Momentum transfer $s$ range (nm <sup>-1</sup> ) | 0.01 – 7.0                                 |                 |                 |                 |                 |                 |
| Exposure time (s)                               | 1 s (SEC-SAXS mode)                        |                 |                 |                 |                 |                 |
| Temperature (°C)                                | 20                                         |                 |                 |                 |                 |                 |
| Buffer                                          | 20 mM Hepes, 100 mM NaCl, 5 mM DTT, pH 7.5 |                 |                 |                 |                 |                 |
| Column                                          | Superdex 200 10/300                        |                 |                 |                 |                 |                 |
| <b>Overall Parameters</b>                       |                                            |                 |                 |                 |                 |                 |
|                                                 | MINDY 2<br>Apo                             | MINDY 2<br>Ub 1 | MINDY 2<br>Ub 2 | MINDY 2<br>Ub 3 | MINDY 2<br>Ub 4 | MINDY 2<br>Ub 5 |
| Number of ubiquitins                            | 0                                          | 1               | 2               | 3               | 4               | 5               |
| Concentration (mg/ml)                           | 8.8                                        | 10.5            | 9.9             | 12.2            | 13.7            | 17.1            |
| $R_g$ from Guinier approximation (nm)           | 2.1±0.1                                    | 2.3±0.1         | 2.5±0.1         | 2.8±0.2         | 2.9±0.2         | 2.8±0.2         |
| $D_{max}$ (nm)                                  | 6.5±0.3                                    | 6.8±0.3         | 8.0±0.4         | 8.8±0.5         | 9.2±0.5         | 9.0±0.6         |
| Excluded (Porod) volume (nm <sup>3</sup> )      | 45±4                                       | 58±6            | 68±7            | 97±9            | 111±10          | 116±10          |
| Molecular weight from Porod invariant, (kDa)    | 28±3                                       | 35±4            | 43±5            | 60±6            | 69±7            | 73±7            |
| Molecular weight from sequence (kDa)            | 31.0                                       | 39.5            | 48.0            | 56.5            | 65.0            | 73.5            |
| <b>Data analysis and modelling</b>              |                                            |                 |                 |                 |                 |                 |
| Primary data reduction                          | SASFLOW                                    |                 |                 |                 |                 |                 |
| Data processing                                 | PRIMUS/CHROMIXS                            |                 |                 |                 |                 |                 |
| Calculation of theoretical data                 | CRYSOL                                     |                 |                 |                 |                 |                 |
| $\chi^2$ Crisol                                 | 2.04                                       | 1.47            | 5.23            | 2.07            | 3.75            | 1.48            |
| Model refinement                                | SREFLEX                                    |                 |                 |                 |                 |                 |
| $\chi^2$ SREFLEX                                | 1.49                                       | -               | -               | 1.15            | 1.32            | -               |
| RMSD                                            | 3.91                                       | -               | -               | 5.01            | 3.35            | -               |
| Multicomponent Mixture Analysis                 | OLIGOMER                                   |                 |                 |                 |                 |                 |
| $\chi^2$ OLIGOMER                               | -                                          | -               | 1.90            | -               | -               | -               |
| SASBDB accession code                           | SASDJ9<br>3                                | SASDJA<br>3     | SASDJ<br>B3     | SASDJC<br>3     | SASDJ<br>D3     | SASDJE<br>3     |



**Table S3: Details of cDNA constructs used in study, related to Figures 1-6**

| <b>Protein</b>              | <b>Expressed protein</b>       | <b>Tag Cleaved</b> | <b>Vector type</b> | <b>Plasmid</b> | <b>DU number</b> |
|-----------------------------|--------------------------------|--------------------|--------------------|----------------|------------------|
| MINDY1 <sup>FL</sup>        | GST-MINDY1 1-469               | Yes                | Bacterial          | pGEX6P1        | 49563            |
| MINDY2 <sup>FL</sup>        | GST-MINDY2 1-621               | Yes                | Bacterial          | pGEX6P1        | 46765            |
| MINDY1 <sup>cat</sup>       | GST-MINDY1 110-384             | Yes                | Bacterial          | pGEX6P1        | 47257            |
| MINDY2 <sup>cat</sup>       | GST-MINDY2 241-504             | Yes                | Bacterial          | pGEX6P1        | 53390            |
| MINDY1 <sup>cat</sup> C137A | GST-MINDY1-C137A 110-384       | Yes                | Bacterial          | pGEX6P1        | 47419            |
| MINDY2 <sup>cat</sup> C266A | GST-MINDY2 C266A 241-504       | Yes                | Bacterial          | pGEX6P1        | 55471            |
| I266A                       | GST-MINDY1-I266A 110-384       | Yes                | Bacterial          | pGEX6P1        | 47820            |
| F339A                       | GST-MINDY1-F339A 110-384       | Yes                | Bacterial          | pGEX6P1        | 47665            |
| I266A-F339A                 | GST-MINDY1-I266A F339A 110-384 | Yes                | Bacterial          | pGEX6P1        | 67842            |
| I395A                       | GST-MINDY2 I395A 241-504       | Yes                | Bacterial          | pGEX6P1        | 55941            |
| F468A                       | GST-MINDY2 F468A 241-504       | Yes                | Bacterial          | pGEX6P1        | 55878            |
| R316A                       | GST-MINDY1-R316A 110-384       | Yes                | Bacterial          | pGEX6P1        | 47668            |
| N317A                       | GST-MINDY1-N317A 110-384       | Yes                | Bacterial          | pGEX6P1        | 59172            |
| D336A                       | GST-MINDY1-D336A 110-384       | Yes                | Bacterial          | pGEX6P1        | 47667            |
| P138A                       | GST-MINDY1-P138A 110-384       | Yes                | Bacterial          | pGEX6P1        | 47661            |
| P138G                       | GST-MINDY1-P138G 110-384       | Yes                | Bacterial          | pGEX6P1        | 59586            |
| P138L                       | GST-MINDY1-P138L 110-384       | Yes                | Bacterial          | pGEX6P1        | 59683            |
| P138W                       | GST-MINDY1-P138W 110-384       | Yes                | Bacterial          | pGEX6P1        | 59684            |
| P136A                       | GST-MINDY1-P136A 110-384       | Yes                | Bacterial          | pGEX6P1        | 47821            |
| P136A P138A                 | GST-MINDY1-P136A P138A 110-384 | Yes                | Bacterial          | pGEX6P1        | 47815            |
| Y114A                       | GST-MINDY1-Y114A 110-384       | Yes                | Bacterial          | pGEX6P1        | 47659            |
| Y114F                       | GST-MINDY1-Y114F 110-384       | Yes                | Bacterial          | pGEX6P1        | 47671            |
| N134A                       | GST-MINDY1-N134A 110-384       | Yes                | Bacterial          | pGEX6P1        | 59152            |
| S321A                       | GST-MINDY1-S321A 110-384       | Yes                | Bacterial          | pGEX6P1        | 47670            |
| S321D                       | GST-MINDY1-S321D 110-384       | Yes                | Bacterial          | pGEX6P1        | 59666            |
| T335V                       | GST-MINDY1-T335V 110-384       | Yes                | Bacterial          | pGEX6P1        | 47757            |

|                         |                                             |         |           |         |       |
|-------------------------|---------------------------------------------|---------|-----------|---------|-------|
| T335D                   | GST-MINDY1-T335D<br>110-384                 | Yes     | Bacterial | pGEX6P1 | 58884 |
| P265A                   | GST-MINDY2 P265A<br>241-504                 | Yes     | Bacterial | pGEX6P1 | 59611 |
| P267A                   | GST-MINDY2 P267A<br>241-504                 | Yes     | Bacterial | pGEX6P1 | 55477 |
| P265A P267A             | GST-MINDY2 P265A<br>P267A 241-504           | Yes     | Bacterial | pGEX6P1 | 59610 |
| P138A C137A             | GST-MINDY1C137A<br>P138A 110-384            | Yes     | Bacterial | pGEX6P1 | 55726 |
| S450A                   | GST-MINDY2-S450A<br>241-504                 | Yes     | Bacterial | pGEX6P1 | 55826 |
| T464V                   | GST-MINDY2-T464V<br>241-504                 | Yes     | Bacterial | pGEX6P1 | 55825 |
| V242G I289A             | GST-MINDY2 V242G<br>I289A 241-504           | Yes     | Bacterial | pGEX6P1 | 70504 |
| V242S I289A             | GST-MINDY2 V242S<br>I289A 241-504           | Yes     | Bacterial | pGEX6P1 | 70505 |
| L304A                   | GST-MINDY2 L304A<br>241-504                 | Yes     | Bacterial | pGEX6P1 | 70501 |
| S324A D325A             | GST-MINDY2 S324A<br>D325A 241-504           | Yes     | Bacterial | pGEX6P1 | 70513 |
| L304A S324A<br>D325A    | GST-MINDY2 L304A<br>S324A D325A 241-<br>504 | Yes     | Bacterial | pGEX6P1 | 70512 |
| R342E                   | GST-MINDY2 R342E<br>241-504                 | Yes     | Bacterial | pGEX6P1 | 70502 |
| E350A                   | GST-MINDY2 E350A<br>241-504                 | Yes     | Bacterial | pGEX6P1 | 55811 |
| Y351A                   | GST-MINDY2 Y351A<br>241-504                 | Yes     | Bacterial | pGEX6P1 | 70507 |
| R343E E350A<br>Y351A    | GST-MINDY2 R343E<br>E350A Y351A 241-<br>504 | Yes     | Bacterial | pGEX6P1 | 70510 |
| Ubiquitin K48R,<br>K63C | 6His-Ub K48R K63C<br>2-76                   | Yes     | Bacterial | pET15b  | 70511 |
| Ubiquitin 1-76          | Ubiquitin (expressed<br>tagless)            | Tagless | Bacterial | pET24   | 20027 |
| Ubiquitin 1-75          | Ub-Intein-CBD 1-75                          | Yes     | Bacterial | pTXB1   | 24149 |
